# Supplementary material
Source: HighWire-hosted journal article supplement (https://thorax.bmj.com/content/76/4/350)
Supplement: inline-supplementary-material-1 [file inline-supplementary-material-1.pdf]

## Frailty Subtypes and Recovery in Older Survivors of Acute Respiratory Failure.

### A Pilot Study.

Matthew R. Baldwin, MD, MS; Lauren R. Pollack, MD; Wendy C. Gonzalez, MD;

Richard A. Friedman, PhD; Simone Norris, MS; Alka Javaid, BS; Max R. O'Donnell, MD,

MPH; Matthew J. Cummings, MD; Dale Needham, MD, PhD; Elizabeth Colantuoni,

PhD; Ursula M. Staudinger, PhD; Mathew S. Maurer, MD; David J. Lederer, MD, MS

## SUPPLEMENTARY MATERIAL

### TABLE OF CONTENTS

|                                                                                        |           |
|----------------------------------------------------------------------------------------|-----------|
| <b>Supplement E-Methods</b> .....                                                      | <b>2</b>  |
| Recruitment and Enrollment of Participants.....                                        | 3         |
| Criteria for Querying the Surrogate.....                                               | 3         |
| Additional Demographic and Clinical Variable Measurements.....                         | 5         |
| Laboratory Measurements.....                                                           | 6         |
| Rationale for including cognitive impairment as a latent class indicator variable..... | 7         |
| Rationale for using serum exosomal proteomics.....                                     | 7         |
| Selection of participants for serum exosome proteomics.....                            | 8         |
| Exosome isolation.....                                                                 | 8         |
| Mass spectroscopy.....                                                                 | 9         |
| Identification of proteins and their concentrations from MS/MS data.....               | 10        |
| Bioinformatics methods.....                                                            | 10        |
| Sensitivity analysis for time-aggregation Bias.....                                    | 12        |
| <b>Supplement E-Results</b> .....                                                      | <b>15</b> |
| <b>Supplement References</b> .....                                                     | <b>31</b> |
| <br>                                                                                   |           |
| <b>Table E1</b> .....                                                                  | <b>4</b>  |
| <b>Table E2</b> .....                                                                  | <b>6</b>  |
| <b>Table E3</b> .....                                                                  | <b>15</b> |
| <b>Table E4</b> .....                                                                  | <b>16</b> |
| <b>Table E5</b> .....                                                                  | <b>17</b> |
| <b>Table E6</b> .....                                                                  | <b>19</b> |
| <b>Table E7</b> .....                                                                  | <b>21</b> |
| <b>Table E8</b> .....                                                                  | <b>22</b> |

**TABLE OF CONTENTS (CONTINUED)**

|                        |           |
|------------------------|-----------|
| <b>Table E9</b> .....  | <b>23</b> |
| <b>Table E10</b> ..... | <b>26</b> |
| <b>Table E11</b> ..... | <b>27</b> |
| <b>Table E12</b> ..... | <b>28</b> |
| <b>Table E13</b> ..... | <b>29</b> |
| <b>Table E14</b> ..... | <b>30</b> |
| <br>                   |           |
| <b>Figure E1</b> ..... | <b>7</b>  |
| <b>Figure E2</b> ..... | <b>18</b> |

## **E-METHODS**

### **Enrollment of Participants**

Exclusion criteria included: severe dementia based on a Clinical Dementia Rating score of >2.0; lives outside of the United States; undomiciled; does not speak English or Spanish; received lung transplantation; received extracorporeal membrane oxygenation for acute respiratory failure; required emergent cardiothoracic, abdominal, or vascular surgery; had pre-existing neurological injury or disease with motor deficits; respiratory failure due to a primary neurologic diagnosis; no surrogate; planned discharge to hospice at the time of enrollment.

### **Criteria for Querying the Surrogate**

We asked the surrogate questions about the patient's baseline functional status for any patients who lacked capacity to sign informed consent, and in those who had cognitive impairment based on CAM-ICU or Mini-cog testing. If a surrogate was unsure about a patient's activities prior to hospitalization, we asked the surrogate to ask other family members or healthcare aides, or we asked permission from the surrogate to speak with other family members or healthcare aides who spent time with the patient prior to hospitalization. For prospective follow-up measurements of disability, we queried the surrogate who provided informed consent when the patient was not able to provide answers for him/herself.

**Table E1.** Assessment of Fried frailty phenotype criteria in older survivors of acute respiratory failure

|                                    |                                                                                                                                                                                                                                                                                                                                                                                                                                                                                                                                                                                                                                                                                                                                                                                                                                                                                                                                                                                                                                                                                                                                                                                |
|------------------------------------|--------------------------------------------------------------------------------------------------------------------------------------------------------------------------------------------------------------------------------------------------------------------------------------------------------------------------------------------------------------------------------------------------------------------------------------------------------------------------------------------------------------------------------------------------------------------------------------------------------------------------------------------------------------------------------------------------------------------------------------------------------------------------------------------------------------------------------------------------------------------------------------------------------------------------------------------------------------------------------------------------------------------------------------------------------------------------------------------------------------------------------------------------------------------------------|
| Shrinking (weight loss)            | Shrinking was defined as report as an unintentional weight loss of $\geq 10$ pounds in the year prior to hospitalization involving intensive care. We asked the surrogate if the participant could not recall. We chose the year prior to hospitalization involving intensive care because weight changes during the index hospitalization may be confounded by treatments for critical illness (e.g. fluid resuscitation for shock, diuresis for pulmonary edema). In the rare instances when the participant and surrogate were unsure, we checked the electronic medical record outpatient notes for participants who received primary care through Columbia University Medical Center, and determined whether the participant lost 10 pounds or more in the year prior to hospitalization based on weights documented at outpatient visits.                                                                                                                                                                                                                                                                                                                                |
| Weakness (Decreased grip strength) | Weakness was assessed at the initial assessment during the week prior to hospital discharge while participants were on the general ward since making this measurement in the ICU is often not feasible because most patients are too critically ill to interact. We measured dominant hand grip dynamometry with the JAMAR Plus+ dynamometer (Patterson Medical, Illinois, USA), and calculated the average grip strength of 3 consecutive tests of maximum grip, as was done in the Cardiovascular Health Study (CHS). To assess the traditional frailty phenotype, weakness was defined based on the CHS criteria. Men met the criteria for weakness if their BMI and grip strength were $\leq 24$ kg/m <sup>2</sup> and $\leq 29$ kg; 24.1-26 kg/m <sup>2</sup> and $\leq 30$ kg; 26.1-28 kg/m <sup>2</sup> and $\leq 31$ kg; and $> 28$ kg/m <sup>2</sup> and $\leq 32$ kg, respectively. Women met the criteria for weakness if their BMI and grip strength were $\leq 23$ kg/m <sup>2</sup> and $\leq 17$ kg; 23.1-26 kg/m <sup>2</sup> and $\leq 17.3$ kg; 26.1-29 kg/m <sup>2</sup> and $\leq 18$ kg; and $> 29$ kg/m <sup>2</sup> and $\leq 21$ kg, respectively (1). |
| Slowness (4.57-meter walk speed)   | Slowness was assessed at the initial assessment during the week prior to hospital discharge while participants were on the general ward, since making this measurement in the ICU admission is often not feasible because most patients are too critically ill to walk. Participants were allowed up to 3 trials of walking 4.57 meters at a normal pace. We used the fastest walk time as the measurement of slowness. Participants were allowed to use canes or walkers, and those who required supplemental oxygen had their supply carried by a nurse assistant. Slowness was defined based on the CHS methodology. Men met criteria if height and walk time were $\leq 173$ cm and $\geq 7$ seconds, or $> 173$ cm and $\geq 6$ seconds, respectively. Women met criteria if height and walk time were $\leq 159$ cm and $\geq 7$ seconds, or $> 159$ cm and $\geq 6$ seconds,                                                                                                                                                                                                                                                                                            |

---

|                       |                                                                                                                                                                                                                                                                                                                                                                                                                                                                                                                                                                                                                                                                                                                                                                                                                                                                                                                                                                                                                                                            |
|-----------------------|------------------------------------------------------------------------------------------------------------------------------------------------------------------------------------------------------------------------------------------------------------------------------------------------------------------------------------------------------------------------------------------------------------------------------------------------------------------------------------------------------------------------------------------------------------------------------------------------------------------------------------------------------------------------------------------------------------------------------------------------------------------------------------------------------------------------------------------------------------------------------------------------------------------------------------------------------------------------------------------------------------------------------------------------------------|
|                       | respectively.(1) Subjects who were unable to walk 4.57 meters with physical therapy had a gait speed of 0 m/s imputed and were considered slow.                                                                                                                                                                                                                                                                                                                                                                                                                                                                                                                                                                                                                                                                                                                                                                                                                                                                                                            |
| Low Physical Activity | We chose to assess physical activity one month prior to hospitalization for both scientific and practical reasons. From a scientific perspective, in the Cardiovascular Health Study, Fried et al. intended to assess physical function in community-dwelling older adults at their baseline (1). Therefore, there is inherent validity in measuring older ICU survivors' function one month prior to hospitalization, since by doing so we capture these participants' baseline function. We substituted the Duke Activities Status Index for the Minnesota Leisure Time Physical Activity questionnaire, since in our prior work we showed that the DASL improves the construct and predictive validity of frailty assessments in ARF survivors (2). To assess the traditional frailty phenotype, low physical activity was defined based on our previously validated cutoffs (men, $\leq 12.5$ units; women, $\leq 10$ units) (2). We asked the surrogate about physical activity the month prior to hospitalization if the patient could not remember. |
| Exhaustion            | Feelings of exhaustion were assessed at the initial assessment during the week prior to hospital discharge while participants were on the general ward. We chose to measure feelings of exhaustion during the post-ICU acute care period because we hypothesized feelings of fatigue after critical illness would hinder recovery. Furthermore, we felt that trying to remember and quantify subjective feelings prior to critical illness would predispose to recall bias. Exhaustion was defined as answers of 'moderate amount of time' or 'most of the time' to two statements from the modified 10-item Center for Epidemiologic Studies Depression Scale: "I felt everything I did was an effort for the past two days" and "I could not get going for the past two days" (3).                                                                                                                                                                                                                                                                       |

---

### **Additional Demographic and Clinical Variable Measurements**

FOCIS-specific variables included the Acute Physiology and Chronic Health Evaluation (APACHE) II score, Charlson comorbidity index, type and duration of mechanical ventilation, and admission and discharge location.

## Laboratory Measurements

**Table E2.** Commercial assays used for serum biomarker measurements

| Biomarker | Type of Assay                | Manufacturer                   | Manufacturer Location |
|-----------|------------------------------|--------------------------------|-----------------------|
| IL-6      | ELISA                        | R&D Systems                    | Minneapolis, MN, USA  |
| TNFR1     | ELISA                        | R&D Systems                    | Minneapolis, MN, USA  |
| IGF-1     | IDS-iSYS                     | Immunodiagnosics Systems       | United Kingdom        |
| DHEAs     | chemiluminescent immunoassay | Siemens Healthcare Diagnostics | Deerfield, IL, USA    |
| SHBG      | chemiluminescent immunoassay | Siemens Healthcare Diagnostics | Deerfield, IL, USA    |
| albumin   | colormetric assay            | Roche Diagnostics              | Indianapolis, IN, USA |

**Quantitation of Testosterone using Liquid Chromatography-Mass Spectrometry at the Columbia CTSA-Biomarker Core lab:** The testosterone was extracted from human serum samples using liquid-liquid extraction. LCMS analysis were done using a triple quadrupole Waters Xevo TQ-S (Waters, Milford, MA) equipped with an electrospray ionization source and integrated with a Waters Acquity UPLC. Chromatographic separation was performed on a Waters C18 BEH column (2.1x100mm, 1.7µm, 130Å) with water and acetonitrile containing 0.1% formic acid as mobile phases. The mass spectrometer was operated under multiple reaction monitoring (MRM) mode with positive electrospray ionization and a MRM transition of 289.2>109.1.

**Quantitation of 25-hydroxy vitamin D2 and D3 using Liquid Chromatography-Mass Spectrometry at the Columbia University CTSA-Biomarker Core lab:** 25-hydroxyvitamin D2 and 25-hydroxyvitamin D3 was measured using Ultra Performance Liquid Chromatography-Tandem Mass Spectrometry (LC-MSMS). 25OHD2 and 25OHD3

was extracted from human serum samples using liquid-liquid extraction and measured using a UPLC-MS/MS platform comprising a triple quadrupole Agilent 6410 mass spectrometer (Agilent, Santa Clara, CA) integrated to Agilent UPLC 1290 series. Chromatographic separation was performed by injecting 10uL of the extract onto a Agilent Poroshell 120 EC-C18 column (3.0 x 50mm, 2.7  $\mu$ m) with water and methanol containing 0.1% formic acid as mobile solvents. The mass spectrometer was operated under multiple reaction monitoring (MRM) mode with positive electrospray ionization. MRM transitions were m/z 413->395 for 25-OH-D2, 401->383 for 25-OH-D3 and 407->389 for d6-25-OH-D3. Calibrators are standardized against the NIST standards.

### Rationale for including cognitive impairment as a latent class indicator variable

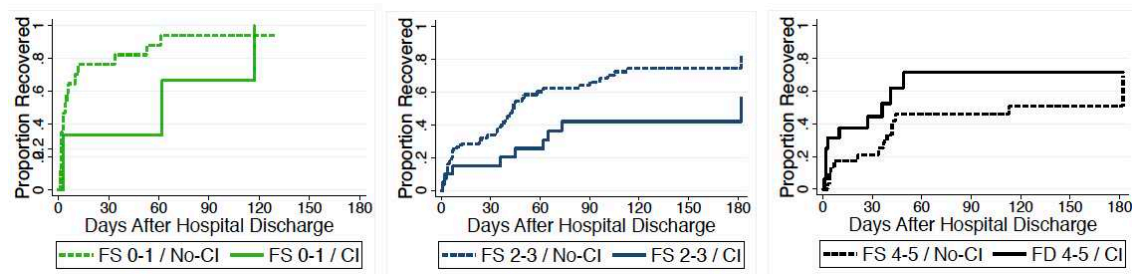

**Figure E1.** Kaplan Meier plots of recovery to pre-hospitalization Basic ADL function in FOCIS-I participants based on Fried Frailty Index scores using Cardiovascular Health Study criteria (grouped 0-1, 2-3, and 4-5), by the absence vs. presence of Cognitive Impairment (CI) at hospital discharge, p-for-interaction = 0.02. Cognitive impairment was defined as the presence of either delirium, assessed by the Confusion Assessment Method-ICU, or dementia, assessed by the Mini-Cog in those without delirium, during the baseline assessment that occurred on the medical ward during the week prior to hospital discharge.

### Rationale for using serum exosomal proteomics

Serum exosomal proteomics is an innovative approach to investigate multisystem dysregulation from a peripheral blood sample (4, 5). Serum proteomics was previously limited because high abundance serum glycoproteins masked lower abundance proteins that may be

novel biomarkers (6-8). Exosomes are 30-100 nm vesicular bodies that are excreted from cells and can enter both neighboring cells and the systemic circulation (9). Exosomes have been recently recognized as a promising noninvasive diagnostic tool in critical illness (10), based on animal and human studies of acute lung injury and sepsis that indicate their involvement in relevant pathobiological functions of vital organs exposed to critical illness stressors (11-14). Protein ontology and pathway analysis of serum exosomal proteomic profiles of ARF survivors offers a systems biology approach to potentially elucidating further the multisystem dysregulation associated with frailty subtypes.

### **Selection of participants for serum exosome proteomics**

Prior to the latent class identification of frailty subtypes, we selected 45 participants for serum exosome proteomics analysis. There were 20 who were not post-ICU frail and 25 who were post-ICU frail by the Fried phenotype criteria. We did not select anyone admitted from a skilled-care facility, and sought to match on age, sex, and pre-hospitalization ADL disability count (Table E4).

### **Exosome isolation**

The Proteomics Shared Resource at Columbia University Medical Center isolated protein from exosomes, performed tandem mass spectroscopy (MS/MS), and identified and quantified exosome proteins.

Exosomes were isolated from 50  $\mu$ l of participant serum using the Total Exosome Isolation Serum Kit (Invitrogen; ThermoFisher Scientific; Waltham, MA). Total exosome lysate was generated in 50  $\mu$ l of lysis buffer (50mmlol/liter ammonium bicarbonate, 4 mol/liter urea, and a protease cocktail) using 1.4 mm ceramic beads and a rupture



homogenizer (OmniBead; Omni International, Eugene, OR). Protein concentration in total exosome lysate was determined using the Qubit Protein Assay Kit (Invitrogen; ThermoFisher Scientific; Waltham, MA).

### **Mass spectroscopy**

Fifteen microliters of exosome lysate from each participant was digested by trypsin and labeled with the Amine-Reactive TMT10-plex Isobaric Mass Tag Labeling Regent Set (ThermoFisher Scientific; Waltham, MA) for MS/MS using the Thermo Orbitrap Fusion Tribrid Mass Spectrometer (ThermoFisher Scientific; Waltham, MA). The concentrated peptide mix was reconstituted in a solution of 2% acetonitrile and 2% formic acid for mass spectroscopy analysis. Peptides were loaded with the auto sampler directly on to a 2 cm C18 PepMap pre-column and were eluted from the 15cm × 75µm inner diameter PepMap RSLC C18, 3 µm column with a 70-minute gradient from 2% Buffer B to 30% Buffer B (100% acetonitrile and 0.1% formic acid). The gradient was switched from 30% to 85% Buffer B over 5 minutes and held constant for 5 minutes. Finally, the gradient was changed from 85% Buffer B to 98% Buffer A (100% water and 0.1% formic acid) over 1 minute, and then held constant at 98% Buffer A for 8 more minutes. Application of a 2.0 kV distal voltage electrospayed the eluting peptides directly into the Orbitrap mass spectrometer equipped with an Easy-Spray source (ThermoFinnigan, SanJose,CA). Full mass spectra were recorded on the peptides over a 400-to1,500 m/z range at 120,000 resolution, followed by MS/MS collision-induced dissociation (CID) events for a total cycle of 3 seconds. Charge state-dependent screening was turned off, and peptides with a charge state of 2 to 6 were analyzed.

Mass spectrometer scanning functions and high-performance liquid chromatography gradients were controlled by an Xcalibur data system (ThermoFinnigan, SanJose,CA). Three technical replicates were run for each sample.

### **Identification of proteins and their concentrations from MS/MS data.**

MS/MS data from raw files were searched against FASTA-formatted sequences of the Uniprot human protein database ([www.uniprot.org](http://www.uniprot.org), January 29, 2017) using Proteome Discoverer software v2.2 (ThermoFisher Scientific; Waltham, MA). This application extracts relevant MS/MS spectra from the .raw file and determines the precursor charge state and the quality of the fragmentation spectrum. The software's probability-based score system rates the relevance of the best matches found by the SEQUEST algorithm (15). The peptide search tolerance was set to 10 ppm. A minimum sequence length of 7 amino acid residues was required. Only fully tryptic peptides were considered. To calculate of confidence levels and false discovery rates (FDR), Proteome Discoverer generates a decoy database containing reverse sequences of the non-decoy protein database and performs the search against this concatenated database (non-decoy + decoy) (16). The discriminant score was set at a 5% false discovery rate (FDR). Spectra counts were used as the quantitative values for the protein-based list.

### **Bioinformatics methods**

Analyses were performed with packages in the R/Bioconductor platform. Intensity values with technical replicates was imputed using the impute package. Qualities were assessed and outliers discarded using Principal Component Analysis (17),

Multidimensional Scaling (18), and Hierarchical clustering (19). All replicates were discarded for a patient containing a single replicate that was an outlier, unless doing so brought the number of patients in a frailty class below 3. After removing outliers, we had 112 samples from 36 patients.

We assessed individual proteome-wide differential protein expression between frailty subtypes using Limma (18), an empirical-Bayesian method (20, 21). The duplicate correlation method, an empirical Bayesian version of mixed-models, was used to include the effect of technical replication in the analysis (22). Given the low sample size and exploratory aim for these proteomic analyses, we set significance at  $p < 0.05$  and a FDR  $< 0.2$  and an absolute  $\log_2$  fold change of  $> 0.2$ .

We conducted the unsupervised clustering analysis using the Cluster 3.0 package (23-25). We calculated the Euclidean distance (24) and performed k-means clustering (24, 26) with  $k=2$  and  $k=100$  iterations. We created heatmaps with protein expression centered using JavaTreeview (23, 27).

We also identified protein functional classes from the Reactome database that differed between frailty subtypes using the Correlation Adjusted Mean Rank gene set test (CAMERA) (28) at  $p < 0.05$  and a FDR  $< 0.2$ . The pre-ranked mode of CAMERA based on the Limma results was used. We corrected for false discoveries by the method of Benjamini and Hochberg (29). The Reactome database is a peer-reviewed resource of human biological processes functions that can be used to discover functional relationships from expression profile data (30). We then identified those proteins differentially expressed according to Limma which belong to the Reactome protein

functional classes identified by CAMERA in order to identify which proteins may be operative in the differential protein functional classes.

### **Sensitivity analysis for time-aggregation Bias**

The most commonly used time-to-event analyses (i.e. Cox proportional hazards model and Fine and Gray competing risk model) assume that the event of interest can occur along a continuum of time (i.e. time is continuous). However, this assumption that time is exactly or continuously measured is often not met in clinical studies with longitudinal follow-up for survey outcome measures. The limitation with having follow-up at fixed time points is that we cannot observe or realistically ask the participant to recall the exact day during the follow-up interval that she/he regained independence in a specific ADL. Therefore, we assume that the time to recovery is the time to the date of the assessment at which the participant reports having returned to an ADL disability count less than or equal to the pre-hospitalization count. This could result in bias in the effect estimates, called time-aggregation bias (31).

We sought to minimize time-aggregation bias with our fixed time point follow-ups of hospital discharge, and 1-month, 3-month, and 6-month post-hospital discharge follow-up by modeling time-to-recovery and time-to-death as time-in-days rather than discrete-time intervals. Specifically, we chose to model recovery after hospitalization as the time-in-days to the date of the follow-up assessment at which recovery was first achieved, and death after hospitalization as the time-in-days to the date of death, rather than assign a discrete-time interval for recovery or death based on the follow-up at which the event was ascertained (i.e. hospital discharge, 1-month, 3-month, or 6-month follow-up).

Modeling our recovery and death data as time-in-days to event, rather than a discrete-time to event intervals not only minimizes time-aggregation bias, but we believe that it is also the most transparent representation of the data. For example, the time intervals from ICU-discharge to hospital-discharge and hospital discharge to 1-month follow-up varied for participants (median (IQR): 7 (4-12) and 34 (31-42) days, respectively). Therefore, we felt that measuring this time-to-event for those who actually recovered to baseline by hospital discharge or 1 month was more accurately represented as the actual number of days, rather than a time-discrete interval (e.g. “1” for hospital discharge, “2” for 1-month follow-up). As another example, for those who died between the first and third month after hospital discharge, modeling time-to-death as the number of days to the date of death more accurately represents the time they survived rather than a time-discrete interval of “3” for assessing death at the 3-month follow-up visit.

Despite modeling recovery as time-in-days to event, we recognize that we are still assigning recovery times at the end of the appropriate interval of time. Therefore, our results may still be subject to time-aggregation bias. To assess the direction and magnitude of time-aggregation bias in our primary analysis, we conducted a sensitivity analysis that sought to minimize time-aggregation bias when using an estimator that assumes exact measurements of duration (31). For those who achieved recovery, we assigned the midpoint of the time interval between the date of the follow-up assessment at which recovery was ascertained and the date of the previous follow-up assessment at which recovery had not yet been achieved. An example calculation for a single patient who recovered is shown in the figure below.

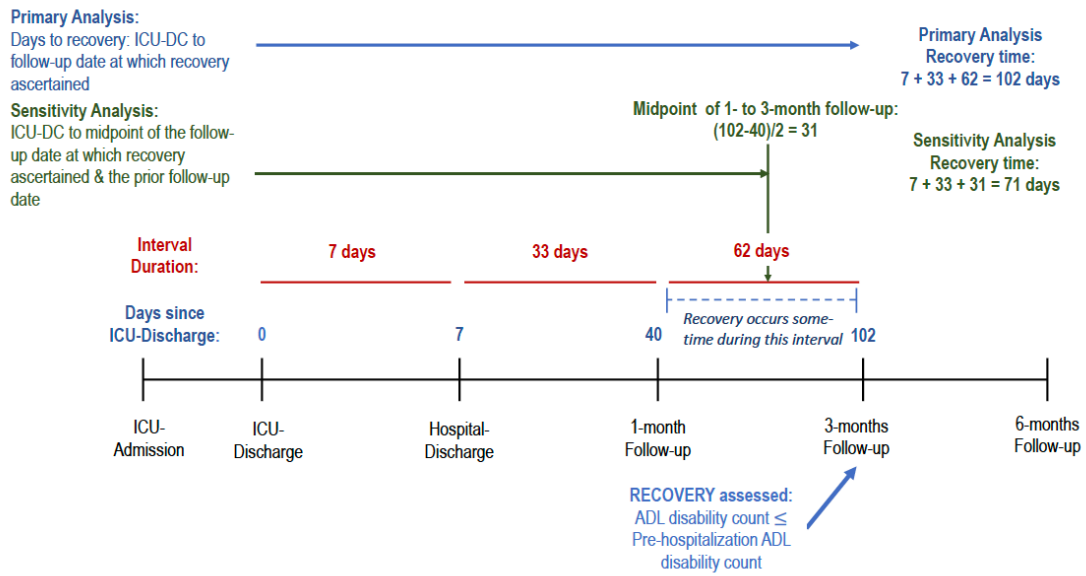

**Figure.** Example of how recovery time was calculated in the primary analysis versus sensitivity analysis that was done to assess for time aggregation bias due to interval follow-up.

**SUPPLEMENT E-RESULTS****Table E3.** List of latent class indicator variables included in latent class models.

| Variable                         | Number of patients with data (total n = 185) | Number of patients with missing data | % missing data |
|----------------------------------|----------------------------------------------|--------------------------------------|----------------|
| Gait-speed                       | 174                                          | 11                                   | 6.0%           |
| Grip-Strength                    | 180                                          | 5                                    | 0.54%          |
| Duke Activity Status Index score | 181                                          | 4                                    | 2.7%           |
| Weight loss                      | 182                                          | 3                                    | 1.6%           |
| Cognitive impairment             | 176                                          | 9                                    | 4.9%           |

**Table E4.** Cytokine, vitamin D, and hormone levels during the week prior to hospital discharge in FOCIS study participants.

| Hormone                                  | IL-6<br>(pg/ml)                             | TNFR-1<br>(pg/ml)                          | 25-hydroxy<br>Vitamin D<br>(ng/ml) | DHEAs<br>(ug/ml)                        |
|------------------------------------------|---------------------------------------------|--------------------------------------------|------------------------------------|-----------------------------------------|
| All, median (IQR);<br>mean ( $\pm$ SD)   | 12 (6.1-24);<br>23 ( $\pm$ 46)              | 3193<br>(2375-5225);<br>5259 ( $\pm$ 5667) | 25 (18-32);<br>25 ( $\pm$ 11)      |                                         |
| Men, median (IQR);<br>mean (SD)          |                                             |                                            |                                    | 0.15 (0.15-0.37);<br>0.29 ( $\pm$ 0.28) |
| Women, median<br>(IQR); mean ( $\pm$ SD) |                                             |                                            |                                    | 0.16 (0.15-0.27);<br>0.24 ( $\pm$ 0.14) |
| Hormone                                  | Total<br>Testosterone<br>(ng/ml)            | Free-<br>Testosterone<br>(pg/ml)           | IGF-1 (ng/ml)                      |                                         |
| All, median (IQR);<br>mean ( $\pm$ SD)   |                                             |                                            |                                    |                                         |
| Men, median (IQR);<br>mean ( $\pm$ SD)   | 1.68<br>(0.72-2.53);<br>1.82 ( $\pm$ 1.38)  | 26.9 (13.3-45.1);<br>30.7 ( $\pm$ 22.2)    | 61 (38-92);<br>69 ( $\pm$ 43)      |                                         |
| Women, median<br>(IQR); mean ( $\pm$ SD) | 0.081<br>(0.05-0.13);<br>0.12 ( $\pm$ 0.17) | 1.07 (0.50-1.86);<br>1.74 ( $\pm$ 2.90)    | 60 (36-92);<br>69 ( $\pm$ 44)      |                                         |

TNFR-1: Tumor necrosis factor soluble receptor 1. IL6: Interleukin-6.

DHEAs: dehydroepiandrosterone-sulfate. IGF-1: Insulin growth factor-1.

Free testosterone was calculated from total testosterone using the Vermeulen formula.



**Table E5.** Characteristics of n = 45 sub-sample of older acute respiratory failure survivors with serum exosome proteomics by frailty subtype

| Characteristic                             | Subtype 1 | Subtype 2 | Subtype 3  | Subtype 4  | Subtype 5     | p-value |
|--------------------------------------------|-----------|-----------|------------|------------|---------------|---------|
| Number of Subjects                         | 16        | 9         | 11         | 5          | 4             |         |
| <b>Demographics</b>                        |           |           |            |            |               |         |
| Age in years, mean (SD)                    | 71 (10)   | 71 (6.4)  | 71 (4.5)   | 78 (7.8)   | 77 (5.5)      | 0.275   |
| Male                                       | 7 (44)    | 3 (33)    | 5 (46)     | 2 (40)     | 2 (50)        | 0.977   |
| Race                                       |           |           |            |            |               | 0.93    |
| White                                      | 15 (94)   | 1 (11)    | 1 (9)      | 0 (0)      | 0 (0)         |         |
| Black                                      | 1 (6)     | 8 (89)    | 9 (82)     | 5 (100)    | 4 (100)       |         |
| Other                                      | 0 (0)     | 0 (0)     | 1 (9)      | 0 (0)      | 0 (0)         |         |
| Hispanic Ethnicity                         | 9 (56)    | 5 (56)    | 10 (91)    | 1 (20)     | 3 (75)        | 0.073   |
| <b>Pre-hospital variables</b>              |           |           |            |            |               |         |
| Residence                                  |           |           |            |            |               |         |
| Home                                       | 15 (100)  | 9 (100)   | 13 (100)   | 4 (100)    | 4 (100)       | <0.001  |
| Skilled-care facility                      | 0 (0)     | 0 (0)     | 0 (0)      | 0 (0)      | 0 (0)         |         |
| ADL dependency count                       | 0         | 0         | 0          | 1 (0-3)    | 0.5 (0-1)     | 0.046   |
| Clinical Frailty Scale score               | 2 (2-2)   | 4 (-35)   | 3 (2-5)    | 5 (4-6)    | 6 (4-6)       | 0.001   |
| Charlson Comorbidity Index Score           | 1 (0.5-2) | 2 (1-3)   | 2 (1-4)    | 2 (1-5)    | 4.5 (3.5-5.5) | 0.078   |
| <b>ICU variables</b>                       |           |           |            |            |               |         |
| APACHE II Score, mean (SD)                 | 27 (6.3)  | 29 (11)   | 35 (8.8)   | 29 (4.3)   | 32 (5.4)      | 0.084   |
| Type of Respiratory Support                |           |           |            |            |               | 0.6     |
| Mechanical Ventilation                     | 14 (88)   | 8 (89)    | 11 (100)   | 4 (80)     | 4 (100)       |         |
| Noninvasive Mechanical Ventilation Only    | 2 (12)    | 1 (11)    | 0 (0)      | 1 (20)     | 0 (0)         |         |
| ICU days                                   | 3 (2-6)   | 4 (3-6)   | 8 (7-16)   | 7 (3-8)    | 7 (3-13)      | 0.011   |
| <b>Post-ICU variables</b>                  |           |           |            |            |               |         |
| Post-ICU Frailty Phenotype score           | 1 (0-2)   | 3 (1-4)   | 3 (3-4)    | 4 (3-4)    | 3 (3-4)       | 0.0001  |
| Cognitive Impairment*                      | 2 (13)    | 1 (11)    | 5 (46)     | 0 (0)      | 4 (100)       | 0.002   |
| ADL dependency count at hospital discharge | 0 (0-2)   | 1 (0-2)   | 5 (2-6)    | 4 (3-5)    | 6 (6-6)       | <0001   |
| Total hospital days                        | 9 (5-15)  | 11 (7-24) | 20 (17-35) | 18 (11-31) | 17 (13-22)    | 0.027   |
| Discharge Location                         |           |           |            |            |               | 0.001   |
| Home                                       | 15 (94)   | 7 (78)    | 4 (36)     | 1 (20)     | 1 (25)        |         |
| Skilled-care facility                      | 1 (6)     | 2 (22)    | 7 (64)     | 4 (80)     | 3 (75)        |         |
| Died in 6 months                           | 0 (0)     | 0 (0)     | 4 (36)     | 1 (20)     | 1 (33)        | <0.001  |

Data are presented as n(%) or Median (IQR) unless otherwise stated. ADL: Activities of Daily Living. \*Cognitive impaired defined as either delirium using the Confusion Assessment Method-ICU or dementia using the Mini-Cog test (score  $\leq 2$ ). Cognitive impairment assessments were conducted during the baseline assessment on the ward, after the ICU, during the week before hospital discharge.

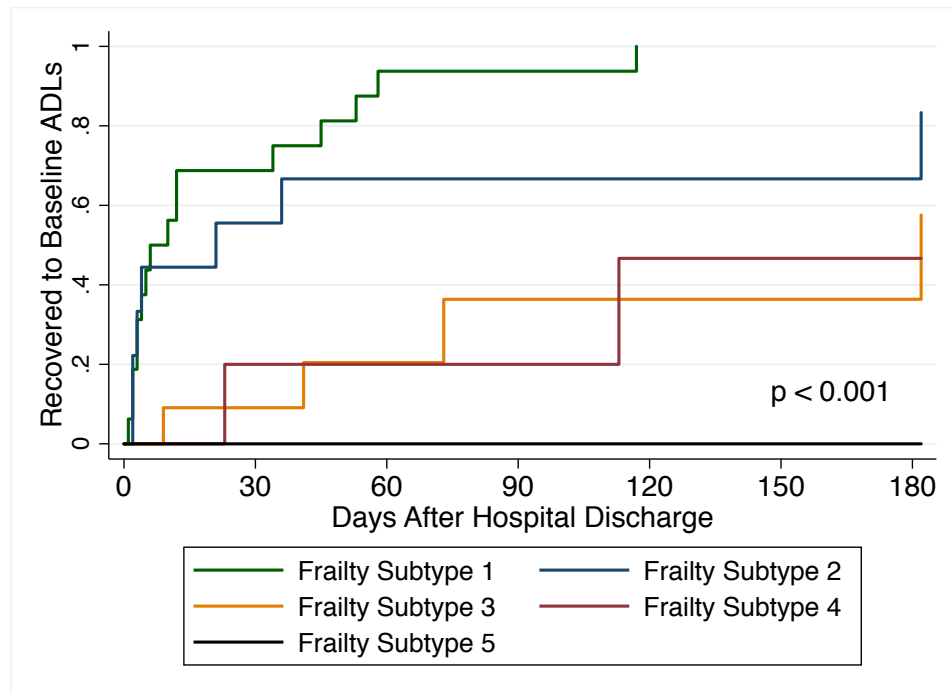

**Figure E2.** Kaplan-Meier cumulative incidence plots of frailty subtypes showing recovery to pre-hospitalization basic activities of daily living (ADLs) independence within 6-months after hospital discharge for the  $n = 45$  sub-sample with serum exosome proteomics.

**Table E6.** Frailty subtype 1 serum exosomal differential protein expression and protein functional class regulation (compared to frailty subtype 2)

| <b>Exosomal proteome-wide differential protein expression identified with Limma (absolute log fold change &gt;0.2 and FDR &lt; 0.2)</b> |                                                                     |                         |       |
|-----------------------------------------------------------------------------------------------------------------------------------------|---------------------------------------------------------------------|-------------------------|-------|
| Count                                                                                                                                   | Protein                                                             | Log Fold Change         | FDR   |
| 1                                                                                                                                       | KRT1                                                                | 0.647                   | 0.034 |
| 2                                                                                                                                       | IGKV2D-24                                                           | -0.531                  | 0.034 |
| 3                                                                                                                                       | CP                                                                  | 0.257                   | 0.034 |
| 4                                                                                                                                       | KRT10                                                               | 0.665                   | 0.047 |
| 5                                                                                                                                       | IGHV4-28                                                            | -0.398                  | 0.074 |
| 6                                                                                                                                       | A0A0G2JRK6                                                          | -0.946                  | 0.079 |
| <b>Differential Reactome protein functional classes regulation identified with CAMERA (FDR &lt; 0.2)</b>                                |                                                                     |                         |       |
| Count                                                                                                                                   | Protein Functional Class                                            | Direction of Regulation | FDR   |
| 1                                                                                                                                       | <b>Immune System</b>                                                |                         |       |
| 2                                                                                                                                       | REACTOME_INNATE_IMMUNE_SYSTEM                                       | Down                    | 0.034 |
| 5                                                                                                                                       | REACTOME_COMPLEMENT_CASCADE                                         | Down                    | 0.034 |
| 3                                                                                                                                       | REACTOME_REGULATION_OF_COMPLEMENT_CASCADE                           | Down                    | 0.034 |
| 4                                                                                                                                       | REACTOME_ACTIVATION_OF_NF_KAPPAB_IN_B_CELLS                         | Up                      | 0.034 |
| 6                                                                                                                                       | REACTOME_DOWNSTREAM_SIGNALING_EVENTS_OF_B_CELL_RECEPTOR_BCR         | Up                      | 0.034 |
| 7                                                                                                                                       | REACTOME_SIGNALING_BY_THE_B_CELL_RECEPTOR_BCR                       | Up                      | 0.034 |
| 8                                                                                                                                       | REACTOME_CROSS_PRESENTATION_OF_SOLUBLE_EXOGENOUS_ANTIGENS_ENDOSOMES | Up                      | 0.178 |
| 9                                                                                                                                       | REACTOME_ANTIGEN_PROCESSING_CROSS_PRESENTATION                      | Up                      | 0.094 |
| 10                                                                                                                                      | REACTOME_ANTIGEN_PROCESSING_UBIQUITINATION_PROTEASOME_DEGRADATION   | Up                      | 0.065 |
| 11                                                                                                                                      | REACTOME_VIF_MEDIATED_DEGRADATION_OF_APOBEC3G                       | Up                      | 0.034 |
| 12                                                                                                                                      | REACTOME_ER_PHAGOSOME_PATHWAY                                       | Up                      | 0.044 |
| 13                                                                                                                                      | REACTOME_HIV_INFECTION                                              | Up                      | 0.063 |
| 14                                                                                                                                      | REACTOME_HOST_INTERACTIONS_OF_HIV_FACTORS                           | Up                      | 0.063 |
|                                                                                                                                         | <b>Cell Cycle Functions</b>                                         |                         |       |
| 15                                                                                                                                      | REACTOME_CELL_CYCLE                                                 | Up                      | 0.034 |
| 16                                                                                                                                      | REACTOME_CELL_CYCLE_MITOTIC                                         | Up                      | 0.034 |
| 17                                                                                                                                      | REACTOME_SIGNALING_BY_WNT                                           | Up                      | 0.034 |
| 18                                                                                                                                      | REACTOME_CELL_CYCLE_CHECKPOINTS                                     | Up                      | 0.034 |
| 19                                                                                                                                      | REACTOME_M_G1_TRANSITION                                            | Up                      | 0.034 |
| 20                                                                                                                                      | REACTOME_G1_S_TRANSITION                                            | Up                      | 0.034 |
| 21                                                                                                                                      | REACTOME_SYNTHESIS_OF_DNA                                           | Up                      | 0.034 |
| 22                                                                                                                                      | REACTOME_MITOTIC_G1_G1_S_PHASES                                     | Up                      | 0.034 |
| 23                                                                                                                                      | REACTOME_REGULATION_OF_MITOTIC_CELL_CYCLE                           | Up                      | 0.034 |
| 24                                                                                                                                      | REACTOME_MITOTIC_M_M_G1_PHASES                                      | Up                      | 0.034 |
| 25                                                                                                                                      | REACTOME_ASSEMBLY_OF_THE_PRE_REPLICATIVE_COMPLEX                    | Up                      | 0.034 |
| 26                                                                                                                                      | REACTOME_DNA_REPLICATION                                            | Up                      | 0.034 |
| 27                                                                                                                                      | REACTOME_MEIOSIS                                                    | Up                      | 0.057 |
| 28                                                                                                                                      | REACTOME_P53_DEPENDENT_G1_DNA_DAMAGE_RESPONSE                       | Up                      | 0.034 |
| 29                                                                                                                                      | REACTOME_P53_INDEPENDENT_G1_S_DNA_DAMAGE_CHECKPOINT                 | Up                      | 0.034 |

|                                                                                                                           |                                                                                                                   |                         |       |
|---------------------------------------------------------------------------------------------------------------------------|-------------------------------------------------------------------------------------------------------------------|-------------------------|-------|
| 30                                                                                                                        | REACTOME_CYCLIN_E_ASSOCIATED_EVENTS_DURING_G1_S_TRANSITION_                                                       | Up                      | 0.034 |
| 31                                                                                                                        | REACTOME_AUTODEGRADATION_OF_THE_E3_UBIQUITIN_LIGASE_COMPLEX1                                                      | Up                      | 0.034 |
| 32                                                                                                                        | REACTOME_S_PHASE                                                                                                  | Up                      | 0.034 |
| 33                                                                                                                        | REACTOME_MEIOTIC_RECOMBINATION                                                                                    | Up                      | 0.081 |
| 34                                                                                                                        | REACTOME_CDK_MEDIATED_PHOSPHORYLATION_AND_REMOVAL_OF_CDC6                                                         | Up                      | 0.034 |
| 35                                                                                                                        | REACTOME_CDT1_ASSOCIATION_WITH_THE_CDC6_ORC_ORIGIN_COMPLEX                                                        | Up                      | 0.034 |
| 36                                                                                                                        | REACTOME_ORC1_REMOVAL_FROM_CHROMATIN                                                                              | Up                      | 0.034 |
| 37                                                                                                                        | REACTOME_APC_C_CDH1_MEDIATED_DEGRADATION_OF_CDC20_AND_OTHER_APC_C_CDH1_TARGETED_PROTEINS_IN_LATE_MITOSIS_EARLY_G1 | Up                      | 0.034 |
| 38                                                                                                                        | REACTOME_APC_C_CDC20_MEDIATED_DEGRADATION_OF_MITOTIC_PROTEINS                                                     | Up                      | 0.034 |
| 39                                                                                                                        | REACTOME_AUTODEGRADATION_OF_CDH1_BY_CDH1_APC_C                                                                    | Up                      | 0.034 |
| 40                                                                                                                        | REACTOME_SCF_BETA_TRCP_MEDIATED_DEGRADATION_OF_EMI1                                                               | Up                      | 0.034 |
| 41                                                                                                                        | REACTOME_SCF_SKP2_MEDIATED_DEGRADATION_OF_P27_P21                                                                 | Up                      | 0.034 |
|                                                                                                                           | <b>Cellular Regulation and Gene Transcription</b>                                                                 |                         |       |
| 42                                                                                                                        | REACTOME_REGULATION_OF_APOPTOSIS                                                                                  | Up                      | 0.064 |
| 43                                                                                                                        | REACTOME_METABOLISM_OF_MRNA                                                                                       | Up                      | 0.034 |
| 44                                                                                                                        | REACTOME_REGULATION_OF_MRNA_STABILITY_BY_PROTEINS_THAT_BIND_AU_RICH_ELEMENTS                                      | Up                      | 0.034 |
| 45                                                                                                                        | REACTOME_DESTABILIZATION_OF_MRNA_BY_AUF1_HNRNP_D0                                                                 | Up                      | 0.034 |
| 46                                                                                                                        | REACTOME_TRANSCRIPTION                                                                                            | Up                      | 0.133 |
| 47                                                                                                                        | REACTOME_RNA_POL_I_RNA_POL_III_AND_MITOCHONDRIAL_TRANSCRIPTION                                                    | Up                      | 0.133 |
| 48                                                                                                                        | REACTOME_RNA_POL_I_TRANSCRIPTION                                                                                  | Up                      | 0.133 |
| 49                                                                                                                        | REACTOME_RNA_POL_I_PROMOTER_OPENING                                                                               | Up                      | 0.133 |
|                                                                                                                           | <b>Metabolism</b>                                                                                                 |                         |       |
| 50                                                                                                                        | REACTOME_METABOLISM_OF_AMINO_ACIDS_AND_DERIVATIVES                                                                | Up                      | 0.034 |
| 51                                                                                                                        | REACTOME_REGULATION_OF_ORNITHINE_DECARBOXYLASE_ODC                                                                | Up                      | 0.068 |
| <b>Proteins differentially expressed by Limma that belong to Reactome functional protein classes identified by CAMERA</b> |                                                                                                                   |                         |       |
| Protein                                                                                                                   | Protein Functional Class                                                                                          | Direction of Regulation |       |
| KRT1                                                                                                                      | Innate immune system                                                                                              | Down                    |       |

**Table E7.** Frailty subtype 1 serum exosomal differential protein expression and protein functional class regulation (compared to frailty subtype 3)

| <b>Exosomal proteome-wide differential protein expression identified with Limma (absolute log fold change &gt;0.2 and FDR &lt; 0.2)</b> |                          |                         |          |
|-----------------------------------------------------------------------------------------------------------------------------------------|--------------------------|-------------------------|----------|
| Count                                                                                                                                   | Protein                  | Log Fold Change         | FDR      |
| 1                                                                                                                                       | TGM4                     | -0.843                  | 0.022    |
| 2                                                                                                                                       | SERPINF2                 | -0.236                  | 0.049    |
| 3                                                                                                                                       | GSN                      | -0.386                  | 0.056    |
| 4                                                                                                                                       | SERPINA3                 | -0.382                  | 0.056    |
| 5                                                                                                                                       | FCGR3A                   | 0.334                   | 0.056    |
| 6                                                                                                                                       | PIGR                     | 0.585                   | 0.056    |
| 7                                                                                                                                       | CRISP3                   | -0.463                  | 0.056    |
| 8                                                                                                                                       | HRG                      | -0.318                  | 0.056    |
| 9                                                                                                                                       | KRT1                     | 0.522                   | 0.056    |
| 10                                                                                                                                      | IGHV4-28                 | -0.373                  | 0.057    |
| 11                                                                                                                                      | SOWAHC                   | -1.497                  | 0.077    |
| 12                                                                                                                                      | FCGBP                    | 0.541                   | 0.077    |
| 13                                                                                                                                      | IGFALS                   | -0.539                  | 0.077    |
| 14                                                                                                                                      | IGHV4-30-2               | -0.462                  | 0.099    |
| 15                                                                                                                                      | SELENOP                  | -0.267                  | 0.099    |
| 16                                                                                                                                      | KRT10                    | 0.536                   | 0.100    |
| 17                                                                                                                                      | CLEC3B                   | -0.309                  | 0.131    |
| 18                                                                                                                                      | KRT9                     | 0.477                   | 0.131    |
| 19                                                                                                                                      | IGLV1-40                 | 0.497                   | 0.152    |
| <b>Differential Reactome protein functional classes identified with CAMERA (FDR &lt; 0.2)</b>                                           |                          |                         |          |
| Count                                                                                                                                   | Protein Functional Class | Direction of Regulation | FDR      |
| 0                                                                                                                                       |                          |                         | all >0.2 |
| <b>Proteins differentially expressed by Limma that belong to Reactome functional protein classes identified by CAMERA</b>               |                          |                         |          |
| Protein                                                                                                                                 | Protein Functional Class | Direction of Regulation |          |
| None, because no differential protein functional classes were identified                                                                |                          |                         |          |

**Table E8.** Frailty subtype 1 serum exosomal differential protein expression and protein functional class regulation (compared to frailty subtype 4)

| <b>Exosomal proteome-wide differential protein expression identified with Limma (absolute log fold change &gt;0.2 and FDR &lt; 0.2)</b> |                                           |                         |       |
|-----------------------------------------------------------------------------------------------------------------------------------------|-------------------------------------------|-------------------------|-------|
| Count                                                                                                                                   | Protein                                   | Log Fold Change         | FDR   |
| 1                                                                                                                                       | IGKV4-1                                   | -0.447                  | 0.118 |
| <b>Differential Reactome protein functional classes identified with CAMERA (FDR &lt; 0.2)</b>                                           |                                           |                         |       |
| Count                                                                                                                                   | Protein Functional Class                  | Direction of Regulation | FDR   |
|                                                                                                                                         | <b>Immune System</b>                      |                         |       |
| 1                                                                                                                                       | REACTOME_INITIAL_TRIGGERING_OF_COMPLEMENT | Down                    | 0.123 |
| 2                                                                                                                                       | REACTOME_CREATION_OF_C4_AND_C2_ACTIVATORS | Down                    | 0.154 |
| <b>Proteins differentially expressed by Limma that belong to Reactome functional protein classes identified by CAMERA</b>               |                                           |                         |       |
| Protein                                                                                                                                 | Protein Functional Class                  | Direction of Regulation |       |
| IGKV4-1                                                                                                                                 | REACTOME_INITIAL_TRIGGERING_OF_COMPLEMENT | Down                    |       |
| IGKV4-1                                                                                                                                 | REACTOME_CREATION_OF_C4_AND_C2_ACTIVATORS | Down                    |       |

**Table E9.** Frailty subtype 1 serum exosomal differential protein expression and protein functional class regulation (compared to frailty subtype 5)

| <b>Exosomal proteome-wide differential protein expression identified with Limma (absolute log fold change &gt;0.2 and FDR &lt; 0.2)</b> |                                                                   |                         |       |
|-----------------------------------------------------------------------------------------------------------------------------------------|-------------------------------------------------------------------|-------------------------|-------|
| Count                                                                                                                                   | Protein                                                           | Log Fold Change         | FDR   |
| 1                                                                                                                                       | FETUB                                                             | -1.136                  | 0.033 |
| 2                                                                                                                                       | TRAJ17                                                            | -1.419                  | 0.033 |
| 3                                                                                                                                       | MST1                                                              | 0.588                   | 0.033 |
| 4                                                                                                                                       | LCN2                                                              | 1.201                   | 0.033 |
| 5                                                                                                                                       | CRP                                                               | 1.941                   | 0.040 |
| 6                                                                                                                                       | TTR                                                               | -0.769                  | 0.065 |
| 7                                                                                                                                       | SERPINF2                                                          | -0.318                  | 0.065 |
| 8                                                                                                                                       | IGLV1-40                                                          | 0.903                   | 0.065 |
| 9                                                                                                                                       | SPRTN                                                             | 2.210                   | 0.068 |
| 10                                                                                                                                      | IGLV2-18                                                          | 0.993                   | 0.106 |
| 11                                                                                                                                      | NDST1                                                             | -0.547                  | 0.120 |
| 12                                                                                                                                      | C4B                                                               | 0.611                   | 0.120 |
| 13                                                                                                                                      | TF                                                                | -0.554                  | 0.120 |
| 14                                                                                                                                      | KLKB1                                                             | -0.409                  | 0.120 |
| 15                                                                                                                                      | HPX                                                               | -0.563                  | 0.120 |
| 16                                                                                                                                      | IGLV3-10                                                          | -0.865                  | 0.122 |
| 17                                                                                                                                      | CLU                                                               | -0.297                  | 0.122 |
| 18                                                                                                                                      | ALB                                                               | -0.379                  | 0.123 |
| 19                                                                                                                                      | KNG1                                                              | -0.312                  | 0.123 |
| 20                                                                                                                                      | SELENOP                                                           | -0.383                  | 0.134 |
| 21                                                                                                                                      | SERPIND1                                                          | -0.702                  | 0.138 |
| 22                                                                                                                                      | PROC                                                              | -0.503                  | 0.154 |
| 23                                                                                                                                      | IGKV1D-33                                                         | 0.752                   | 0.161 |
| 24                                                                                                                                      | AMBP                                                              | -0.365                  | 0.161 |
| 25                                                                                                                                      | AHSG                                                              | -0.503                  | 0.177 |
| 26                                                                                                                                      | SERPINA4                                                          | -0.436                  | 0.177 |
| 27                                                                                                                                      | GPX3                                                              | -0.562                  | 0.200 |
| 28                                                                                                                                      | ECM1                                                              | 0.482                   | 0.200 |
| 29                                                                                                                                      | ORM2                                                              | -0.462                  | 0.200 |
| <b>Differential Reactome protein functional classes identified with CAMERA (FDR &lt; 0.2)</b>                                           |                                                                   |                         |       |
| Count                                                                                                                                   | Protein Functional Class                                          | Direction of Regulation | FDR   |
|                                                                                                                                         | <b>Immune System</b>                                              |                         |       |
| 1                                                                                                                                       | REACTOME_COMPLEMENT_CASCADE                                       | Down                    | 0.173 |
| 2                                                                                                                                       | REACTOME_ADAPTIVE_IMMUNE_SYSTEM                                   | Up                      | 0.173 |
| 3                                                                                                                                       | REACTOME_ER_PHAGOSOME_PATHWAY                                     | Up                      | 0.173 |
| 4                                                                                                                                       | REACTOME_ANTIGEN_PROCESSING_UBIQUITINATION_PROTEASOME_DEGRADATION | Up                      | 0.173 |
| 5                                                                                                                                       | REACTOME_DOWNSTREAM_SIGNALING_EVENTS_OF_B_CELL_RECEPTOR_BCR       | Up                      | 0.173 |
| 6                                                                                                                                       | REACTOME_ACTIVATION_OF_NF_KAPPAB_IN_B_CELLS                       | Up                      | 0.173 |
| 7                                                                                                                                       | REACTOME_SIGNALING_BY_THE_B_CELL_RECEPTOR_BCR                     | Up                      | 0.173 |
| 8                                                                                                                                       | REACTOME_ANTIGEN_PROCESSING_CROSS_PRESENTATION                    | Up                      | 0.173 |

|    |                                                                                                                   |    |       |
|----|-------------------------------------------------------------------------------------------------------------------|----|-------|
| 9  | REACTOME_CLASS_I_MHC_MEDIATED_ANTIGEN_PROCESSING_PRESENTATION                                                     | Up | 0.173 |
| 10 | REACTOME_CYTOKINE_SIGNALING_IN_IMMUNE_SYSTEM                                                                      | Up | 0.173 |
| 11 | REACTOME_VIF_MEDIATED_DEGRADATION_OF_APOBEC3G                                                                     | Up | 0.173 |
| 12 | REACTOME_HIV_INFECTION                                                                                            | Up | 0.173 |
| 13 | REACTOME_HOST_INTERACTIONS_OF_HIV_FACTORS                                                                         | Up | 0.173 |
|    | <b>Cell Cycle Functions</b>                                                                                       |    |       |
| 14 | REACTOME_CELL_CYCLE_MITOTIC                                                                                       | Up | 0.173 |
| 15 | REACTOME_SIGNALING_BY_WNT                                                                                         | Up | 0.173 |
| 16 | REACTOME_ORC1_REMOVAL_FROM_CHROMATIN                                                                              | Up | 0.173 |
| 17 | REACTOME_CELL_CYCLE                                                                                               | Up | 0.173 |
| 18 | REACTOME_P53_INDEPENDENT_G1_S_DNA_DAMAGE_CHECKPOINT                                                               | Up | 0.173 |
| 19 | REACTOME_CDK_MEDIATED_PHOSPHORYLATION_AND_REMOVAL_OF_CDC6                                                         | Up | 0.173 |
| 20 | REACTOME_CELL_CYCLE_CHECKPOINTS                                                                                   | Up | 0.173 |
| 21 | REACTOME_CYCLIN_E_ASSOCIATED_EVENTS_DURING_G1_S_TRANSITION                                                        | Up | 0.173 |
| 22 | REACTOME_P53_DEPENDENT_G1_DNA_DAMAGE_RESPONSE                                                                     | Up | 0.173 |
| 23 | REACTOME_M_G1_TRANSITION                                                                                          | Up | 0.173 |
| 24 | REACTOME_G1_S_TRANSITION                                                                                          | Up | 0.173 |
| 25 | REACTOME_CDT1_ASSOCIATION_WITH_THE_CDC6_ORC_ORIGIN_COMPLEX                                                        | Up | 0.173 |
| 26 | REACTOME_SYNTHESIS_OF_DNA                                                                                         | Up | 0.173 |
| 27 | REACTOME_AUTODEGRADATION_OF_THE_E3_UBIQUITIN_LIGASE_COP1                                                          | Up | 0.173 |
| 28 | REACTOME_MITOTIC_G1_G1_S_PHASES                                                                                   | Up | 0.173 |
| 29 | REACTOME_REGULATION_OF_MITOTIC_CELL_CYCLE                                                                         | Up | 0.173 |
| 30 | REACTOME_MITOTIC_M_M_G1_PHASES                                                                                    | Up | 0.173 |
| 31 | REACTOME_ASSEMBLY_OF_THE_PRE_REPLICATIVE_COMPLEX                                                                  | Up | 0.173 |
| 32 | REACTOME_APC_C_CDH1_MEDIATED_DEGRADATION_OF_CDC20_AND_OTHER_APC_C_CDH1_TARGETED_PROTEINS_IN_LATE_MITOSIS_EARLY_G1 | Up | 0.173 |
| 33 | REACTOME_APC_C_CDC20_MEDIATED_DEGRADATION_OF_MITOTIC_PROTEINS                                                     | Up | 0.173 |
| 34 | REACTOME_AUTODEGRADATION_OF_CDH1_BY_CDH1_APC_C                                                                    | Up | 0.173 |
| 35 | REACTOME_SCF_BETA_TRCP_MEDIATED_DEGRADATION_OF_EMI1                                                               | Up | 0.173 |
| 36 | REACTOME_S_PHASE                                                                                                  | Up | 0.173 |
| 37 | REACTOME_SCF_SKP2_MEDIATED_DEGRADATION_OF_P27_P21                                                                 | Up | 0.173 |
| 38 | REACTOME_DNA_REPLICATION                                                                                          | Up | 0.173 |
|    | <b>Cellular Regulation and Gene Transcription</b>                                                                 |    |       |
| 39 | REACTOME_METABOLISM_OF_MRNA                                                                                       | Up | 0.173 |
| 40 | REACTOME_METABOLISM_OF_RNA                                                                                        | Up | 0.173 |
| 41 | REACTOME_REGULATION_OF_MRNA_STABILITY_BY_PROTEINS_THAT_BIND_AU_RICH_ELEMENTS                                      | Up | 0.173 |
| 42 | REACTOME_MEMBRANE_TRAFFICKING                                                                                     | Up | 0.173 |



|                                                                                                                           |                                                                                                                      |                         |       |
|---------------------------------------------------------------------------------------------------------------------------|----------------------------------------------------------------------------------------------------------------------|-------------------------|-------|
| 43                                                                                                                        | REACTOME_DESTABILIZATION_OF_MRNA_BY_AUF1_HNRNP_D0                                                                    | Up                      | 0.173 |
| 44                                                                                                                        | REACTOME_TRANS_GOLGI_NETWORK_VESICLE_BUDDING                                                                         | Up                      | 0.173 |
| 45                                                                                                                        | REACTOME_GOLGI_ASSOCIATED_VESICLE_BIOGENESIS                                                                         | Up                      | 0.173 |
|                                                                                                                           | <b>Metabolism</b>                                                                                                    |                         |       |
| 46                                                                                                                        | REACTOME_REGULATION_OF_INSULIN_LIKE_GROWTH_FACTOR_IGF_ACTIVITY_BY_INSULIN_LIKE_GROWTH_FACTOR_BINDING_PROTEINS_IGFBPS | Down                    | 0.173 |
| 47                                                                                                                        | REACTOME_REGULATION_OF_ORNITHINE_DECARBOXYLASE_ODC                                                                   | Up                      | 0.186 |
| 48                                                                                                                        | REACTOME_PTM_GAMMA_CARBOXYLATION_HYPUSINE_FORMATION_AND_ARYLSULFATASE_ACTIVATION                                     | Down                    | 0.173 |
| 49                                                                                                                        | REACTOME_GAMMA_CARBOXYLATION_TRANSPORT_AND_AMINO_TERMINAL_CLEAVAGE_OF_PROTEINS                                       | Down                    | 0.173 |
| <b>Proteins differentially expressed by Limma that belong to Reactome functional protein classes identified by CAMERA</b> |                                                                                                                      |                         |       |
| Protein                                                                                                                   | Protein Functional Class                                                                                             | Direction of Regulation |       |
| CLU                                                                                                                       | COMPLEMENT_CASCADE                                                                                                   | Down                    |       |
| CRP                                                                                                                       | COMPLEMENT_CASCADE                                                                                                   | Down                    |       |
| C4B                                                                                                                       | COMPLEMENT_CASCADE                                                                                                   | Down                    |       |
| LCN2                                                                                                                      | CYTOKINE_SIGNALING_IN_IMMUNE_SYSTEM                                                                                  | Up                      |       |
| TF                                                                                                                        | MEMBRANE_TRAFFICKING                                                                                                 | Up                      |       |

**Table E10.** Frailty subtype 2 serum exosomal differential protein expression and protein functional class regulation (compared to frailty subtype 3)

| <b>Exosomal proteome-wide differential protein expression identified with Limma (absolute log fold change &gt;0.2 and FDR &lt; 0.2)</b> |                          |                         |          |
|-----------------------------------------------------------------------------------------------------------------------------------------|--------------------------|-------------------------|----------|
| Count                                                                                                                                   | Protein                  | Log Fold Change         | FDR      |
| 1                                                                                                                                       | PIGR                     | 0.910817949             | 0.01931  |
| 2                                                                                                                                       | FCGR2C                   | 0.606356196             | 0.03191  |
| 3                                                                                                                                       | CFHR4                    | -0.84133022             | 0.03191  |
| 4                                                                                                                                       | HP                       | -1.230259491            | 0.05021  |
| 5                                                                                                                                       | C9                       | -0.428717542            | 0.05993  |
| <b>Differential Reactome protein functional classes identified with CAMERA (FDR &lt; 0.2)</b>                                           |                          |                         |          |
| Count                                                                                                                                   | Protein Functional Class | Direction of Regulation | FDR      |
| 0                                                                                                                                       |                          |                         | all >0.2 |
| <b>Proteins differentially expressed by Limma that belong to Reactome functional protein classes identified by CAMERA</b>               |                          |                         |          |
| Protein                                                                                                                                 | Protein Functional Class | Direction of Regulation |          |
| None, because no differential protein functional classes were identified                                                                |                          |                         |          |

**Table E11.** Frailty subtype 2 serum exosomal differential protein expression and protein functional class regulation (compared to frailty subtype 4)

| <b>Exosomal proteome-wide differential protein expression identified with Limma (absolute log fold change &gt;0.2 and FDR &lt; 0.2)</b> |                          |                         |          |
|-----------------------------------------------------------------------------------------------------------------------------------------|--------------------------|-------------------------|----------|
| Count                                                                                                                                   | Protein                  | Log Fold Change         | FDR      |
| 1                                                                                                                                       | IGLV2-8                  | 0.853430894             | 0.014    |
| 2                                                                                                                                       | CP                       | -0.374654389            | 0.0195   |
| 3                                                                                                                                       | VCL                      | 0.720239874             | 0.0384   |
| 4                                                                                                                                       | IGHV4-30-2               | 0.712998347             | 0.1187   |
| <b>Differential Reactome protein functional classes identified with CAMERA (FDR &lt; 0.2)</b>                                           |                          |                         |          |
| Count                                                                                                                                   | Protein Functional Class | Direction of Regulation | FDR      |
| 0                                                                                                                                       |                          |                         | all >0.2 |
| <b>Proteins differentially expressed by Limma that belong to Reactome functional protein classes identified by CAMERA</b>               |                          |                         |          |
| Protein                                                                                                                                 | Protein Functional Class | Direction of Regulation |          |
| None, because no differential protein functional classes were identified                                                                |                          |                         |          |

**Table E12.** Frailty subtype 2 serum exosomal differential protein expression and protein functional class regulation (compared to frailty subtype 5)

| <b>Exosomal proteome-wide differential protein expression identified with Limma (absolute log fold change &gt;0.2 and FDR &lt; 0.2)</b> |                                                                                   |                         |         |
|-----------------------------------------------------------------------------------------------------------------------------------------|-----------------------------------------------------------------------------------|-------------------------|---------|
| Count                                                                                                                                   | Protein                                                                           | Log Fold Change         | FDR     |
| 1                                                                                                                                       | FETUB                                                                             | -1.23286714             | 0.02667 |
| 2                                                                                                                                       | LCN2                                                                              | 1.155408382             | 0.07211 |
| 3                                                                                                                                       | AMBP                                                                              | -0.469067214            | 0.1238  |
| 4                                                                                                                                       | IGKV1D-33                                                                         | 0.864572367             | 0.14815 |
| 5                                                                                                                                       | TGFBI                                                                             | 0.513221366             | 0.14815 |
| 6                                                                                                                                       | IGLV2-18                                                                          | 1.153498669             | 0.14815 |
| 7                                                                                                                                       | KLKB1                                                                             | -0.44994892             | 0.14815 |
| 8                                                                                                                                       | MST1                                                                              | 0.540726476             | 0.17023 |
| 9                                                                                                                                       | IGKV1D-13                                                                         | -2.267569247            | 0.17023 |
| 10                                                                                                                                      | HPX                                                                               | -0.700607707            | 0.17023 |
| 11                                                                                                                                      | KNG1                                                                              | -0.331515205            | 0.17023 |
| 12                                                                                                                                      | IGHG4                                                                             | 1.485238115             | 0.17023 |
| 13                                                                                                                                      | ITIH1                                                                             | -0.415246292            | 0.17023 |
| 14                                                                                                                                      | SERPINF2                                                                          | -0.277060068            | 0.17023 |
| 15                                                                                                                                      | PROZ                                                                              | -1.102493098            | 0.17023 |
| 16                                                                                                                                      | SERPIND1                                                                          | -0.726648749            | 0.17023 |
| 17                                                                                                                                      | SPRTN                                                                             | 1.754369604             | 0.20069 |
| <b>Differential Reactome protein functional classes identified with CAMERA (FDR &lt; 0.2)</b>                                           |                                                                                   |                         |         |
| Count                                                                                                                                   | Protein Functional Class                                                          | Direction of Regulation | FDR     |
| 1                                                                                                                                       | REACTOME_PTM_GAMMA_CARBOXYLATION_HYPUSIN_E_FORMATION_AND_ARYLSULFATASE_ACTIVATION | Down                    | 0.0857  |
| 2                                                                                                                                       | REACTOME_GAMMA_CARBOXYLATION_TRANSPORT_AND_AMINO_TERMINAL_CLEAVAGE_OF_PROTEINS    | Down                    | 0.0857  |
| <b>Proteins differentially expressed by Limma that belong to Reactome functional protein classes identified by CAMERA</b>               |                                                                                   |                         |         |
| Protein                                                                                                                                 | Protein Functional Class                                                          | Direction of Regulation |         |
| PROZ                                                                                                                                    | REACTOME_PTM_GAMMA_CARBOXYLATION_HYPUSIN_E_FORMATION_AND_ARYLSULFATASE_ACTIVATION | Down                    |         |
| PROZ                                                                                                                                    | REACTOME_GAMMA_CARBOXYLATION_TRANSPORT_AND_AMINO_TERMINAL_CLEAVAGE_OF_PROTEINS    | Down                    |         |

**Table E13.** Frailty subtype 3 serum exosomal differential protein expression and protein functional class regulation (compared to frailty subtype 4)

| <b>Exosomal proteome-wide differential protein expression identified with Limma (absolute log fold change &gt;0.2 and FDR &lt; 0.2)</b> |                          |                         |          |
|-----------------------------------------------------------------------------------------------------------------------------------------|--------------------------|-------------------------|----------|
| Count                                                                                                                                   | Protein                  | Log Fold Change         | FDR      |
| 1                                                                                                                                       | IGKV4-1                  | -0.4950067              | 0.02571  |
| 2                                                                                                                                       | IGHV4-30-2               | 0.72774176              | 0.12816  |
| 3                                                                                                                                       | SAA2-SAA4                | 1.06600823              | 0.12816  |
| 4                                                                                                                                       | SAA1                     | 1.83720225              | 0.12816  |
| 5                                                                                                                                       | F13A1                    | -0.504736               | 0.14899  |
| <b>Differential Reactome protein functional classes identified with CAMERA (FDR &lt; 0.2)</b>                                           |                          |                         |          |
| Count                                                                                                                                   | Protein Functional Class | Direction of Regulation | FDR      |
| 0                                                                                                                                       |                          |                         | all >0.2 |
| <b>Proteins differentially expressed by Limma that belong to Reactome functional protein classes identified by CAMERA</b>               |                          |                         |          |
| Protein                                                                                                                                 | Protein Functional Class | Direction of Regulation |          |
| None, because no differential protein functional classes were identified                                                                |                          |                         |          |

**Table E14.** Frailty subtype 3 serum exosomal differential protein expression and protein functional class regulation (compared to frailty subtype 5)

| <b>Exosomal proteome-wide differential protein expression identified with Limma (absolute log fold change &gt;0.2 and FDR &lt; 0.2)</b> |                          |                         |          |
|-----------------------------------------------------------------------------------------------------------------------------------------|--------------------------|-------------------------|----------|
| Count                                                                                                                                   | Protein                  | Log Fold Change         | FDR      |
| 1                                                                                                                                       | IGLV3-10                 | -1.1356051              | 0.07302  |
| 2                                                                                                                                       | FCGR3A                   | -0.5584034              | 0.07302  |
| 3                                                                                                                                       | LCN2                     | 1.10816193              | 0.07302  |
| 4                                                                                                                                       | AHSG                     | -0.636413               | 0.12307  |
| 5                                                                                                                                       | SPRTN                    | 2.07023074              | 0.12307  |
| <b>Differential Reactome protein functional classes identified with CAMERA (FDR &lt; 0.2)</b>                                           |                          |                         |          |
| Count                                                                                                                                   | Protein Functional Class | Direction of Regulation | FDR      |
| 0                                                                                                                                       |                          |                         | all >0.2 |
| <b>Proteins differentially expressed by Limma that belong to Reactome functional protein classes identified by CAMERA</b>               |                          |                         |          |
| Protein                                                                                                                                 | Protein Functional Class | Direction of Regulation |          |
| None, because no differential protein functional classes were identified                                                                |                          |                         |          |

**There were no differentially expressed proteins nor Reactome protein functional classes comparing subtype 4 to subtype 5.**

**SUPPLEMENT REFERENCES**

1. Fried LP, Tangen CM, Walston J, Newman AB, Hirsch C, Gottdiener J, Seeman T, Tracy R, Kop WJ, Burke G, McBurnie MA. Frailty in older adults: Evidence for a phenotype. *J Gerontol A Biol Sci Med Sci* 2001; 56A: M146-M156.
2. Baldwin MR, Singer JP, Huang D, Sell J, Gonzalez WC, Pollack LR, Maurer MS, D'Ovidio FF, Bacchetta M, Sonett JR, Arcasoy SM, Shah L, Robbins H, Hays SR, Kukreja J, Greenland JR, Shah RJ, Leard L, Morrell M, Gries C, Katz PP, Christie JD, Diamond JM, Lederer DJ. Refining Low Physical Activity Measurement Improves Frailty Assessment in Advanced Lung Disease and Survivors of Critical Illness. *Annals of the American Thoracic Society* 2017; 14: 1270-1279.
3. Orme JG, Reis J, Herz EJ. Factorial and discriminant validity of the Center for Epidemiological Studies Depression (CES-D) scale. *Journal of clinical psychology* 1986; 42: 28-33.
4. Raimondo F, Morosi L, Chinello C, Magni F, Pitto M. Advances in membranous vesicle and exosome proteomics improving biological understanding and biomarker discovery. *Proteomics* 2011; 11: 709-720.
5. Greening DW, Xu R, Gopal SK, Rai A, Simpson RJ. Proteomic insights into extracellular vesicle biology - defining exosomes and shed microvesicles. *Expert review of proteomics* 2017; 14: 69-95.

6. States DJ, Omenn GS, Blackwell TW, Fermin D, Eng J, Speicher DW, Hanash SM.  
Challenges in deriving high-confidence protein identifications from data gathered by a HUPO plasma proteome collaborative study. *Nature biotechnology* 2006; 24: 333-338.
7. Anderson NL, Anderson NG. The human plasma proteome: history, character, and diagnostic prospects. *Molecular & cellular proteomics : MCP* 2002; 1: 845-867.
8. Schiess R, Wollscheid B, Aebersold R. Targeted proteomic strategy for clinical biomarker discovery. *Molecular oncology* 2009; 3: 33-44.
9. Yanez-Mo M, Siljander PR, Andreu Z, Zavec AB, Borrás FE, Buzas EI, Buzas K, Casal E, Cappello F, Carvalho J, Colas E, Cordeiro-da Silva A, Fais S, Falcon-Perez JM, Ghobrial IM, Giebel B, Gimona M, Graner M, Gursel I, Gursel M, Heegaard NH, Hendrix A, Kierulf P, Kokubun K, Kosanovic M, Kralj-Iglic V, Kramer-Albers EM, Laitinen S, Lasser C, Lener T, Ligeti E, Line A, Lipps G, Llorente A, Lotvall J, Mancek-Keber M, Marcilla A, Mittelbrunn M, Nazarenko I, Nolte-'t Hoen EN, Nyman TA, O'Driscoll L, Olivan M, Oliveira C, Pallinger E, Del Portillo HA, Reventos J, Rigau M, Rohde E, Sammar M, Sanchez-Madrid F, Santarem N, Schallmoser K, Ostendorf MS, Stoorvogel W, Stukelj R, Van der Grein SG, Vasconcelos MH, Wauben MH, De Wever O. Biological properties of extracellular vesicles and their physiological functions. *Journal of extracellular vesicles* 2015; 4: 27066.
10. Terrasini N, Lionetti V. Exosomes in Critical Illness. *Crit Care Med* 2017; 45: 1054-1060.



11. Wu SC, Yang JC, Rau CS, Chen YC, Lu TH, Lin MW, Tzeng SL, Wu YC, Wu CJ, Hsieh CH. Profiling circulating microRNA expression in experimental sepsis using cecal ligation and puncture. *PLoS one* 2013; 8: e77936.
12. Moon HG, Cao Y, Yang J, Lee JH, Choi HS, Jin Y. Lung epithelial cell-derived extracellular vesicles activate macrophage-mediated inflammatory responses via ROCK1 pathway. *Cell death & disease* 2015; 6: e2016.
13. Janiszewski M, Do Carmo AO, Pedro MA, Silva E, Knobel E, Laurindo FR. Platelet-derived exosomes of septic individuals possess proapoptotic NAD(P)H oxidase activity: A novel vascular redox pathway. *Critical care medicine* 2004; 32: 818-825.
14. Kovach MA, Singer BH, Newstead MW, Zeng X, Moore TA, White ES, Kunkel SL, Peters-Golden M, Standiford TJ. IL-36gamma is secreted in microparticles and exosomes by lung macrophages in response to bacteria and bacterial components. *Journal of leukocyte biology* 2016; 100: 413-421.
15. Yates JR, 3rd, Eng JK, McCormack AL, Schieltz D. Method to correlate tandem mass spectra of modified peptides to amino acid sequences in the protein database. *Analytical chemistry* 1995; 67: 1426-1436.
16. Elias JE, Gygi SP. Target-decoy search strategy for increased confidence in large-scale protein identifications by mass spectrometry. *Nature methods* 2007; 4: 207-214.
17. McDonald JW. affycoretools: Functions useful for those doing repetitive analyses with Affymetrix GeneChips. 1.52.2 ed; 2018.

18. Ritchie ME, Phipson B, Wu D, Hu Y, Law CW, Shi W, Smyth GK. limma powers differential expression analyses for RNA-sequencing and microarray studies. *Nucleic acids research* 2015; 43: e47.
19. R Core Team. R: A Language and Environment for Statistical Computing}. 3.5.2 ed. Vienna, Austria: R Foundation for Statistical Computing; 2018.
20. Smyth GK. Linear Models and Empirical Bayes Methods for Assessing Differential Expression in Microarray Experiments. *Statistical Applications in Genetics and Molecular Biology* 2004; 3: Article 3, <http://www.bepress.com/sagmb/vol3/iss1/art3/>.
21. Ritchie ME, Diyagama D, Neilson J, van Laar R, Dobrovic A, Holloway A, Smyth GK. Empirical array quality weights in the analysis of microarray data. *BMC bioinformatics* 2006; 7: 261.
22. Smyth GK, Michaud J, Scott HS. Use of within-array replicate spots for assessing differential expression in microarray experiments. *Bioinformatics* 2005; 21: 2067-2075.
23. Eisen MB, Spellman PT, Brown PO, Botstein D. Cluster analysis and display of genome-wide expression patterns. *Proc Natl Acad Sci USA* 1998; 95: 14863-14868.
24. Everitt BS, Landau S, Leese M. Cluster Analysis. Wiley; 2011.
25. de Hoon MJ, Imoto S, Nolan J, Miyano S. Open source clustering software. *Bioinformatics* 2004; 20: 1453-1454.

26. Lloyd SP. Least square quantization in PCM. *IEEE Transactions on Information Theory* 1957; 28: 129–137.
27. Saldanha AJ. Java Treeview--extensible visualization of microarray data. *Bioinformatics* 2004; 20: 3246-3248.
28. Wu D, Smyth GK. Camera: a competitive gene set test accounting for inter-gene correlation. *Nucleic acids research* 2012; 40: e133.
29. Benjamini Y, Hochberg Y. Controlling the false discovery rate; A practical and powerful approach to multiple testing. *J Roy Stat Soc Ser B* 1995; 57: 289-300.
30. Matthews L, Gopinath G, Gillespie M, Caudy M, Croft D, de Bono B, Garapati P, Hemish J, Hermjakob H, Jassal B, Kanapin A, Lewis S, Mahajan S, May B, Schmidt E, Vastrik I, Wu G, Birney E, Stein L, D'Eustachio P. Reactome knowledgebase of human biological pathways and processes. *Nucleic acids research* 2009; 37: D619-622.
31. Petersen T. Time-Aggregation Bias in Continuous-Time Hazard-Rate Models. *Sociological Methodology* 1991; 21: 263-290.
